# Supplementary material for: The prognostic significance of GRB7 protein expression and localization in human breast and ovarian cancers
Source: PubMed Central journal article supplement (PMC7299530; doi:10.18632/oncotarget.27593), 2020-06-16
Supplement: oncotarget-11-2273-s001.pdf [file oncotarget-11-2273-s001.pdf]

# The prognostic significance of GRB7 protein expression and localization in human breast and ovarian cancers

## SUPPLEMENTARY MATERIALS

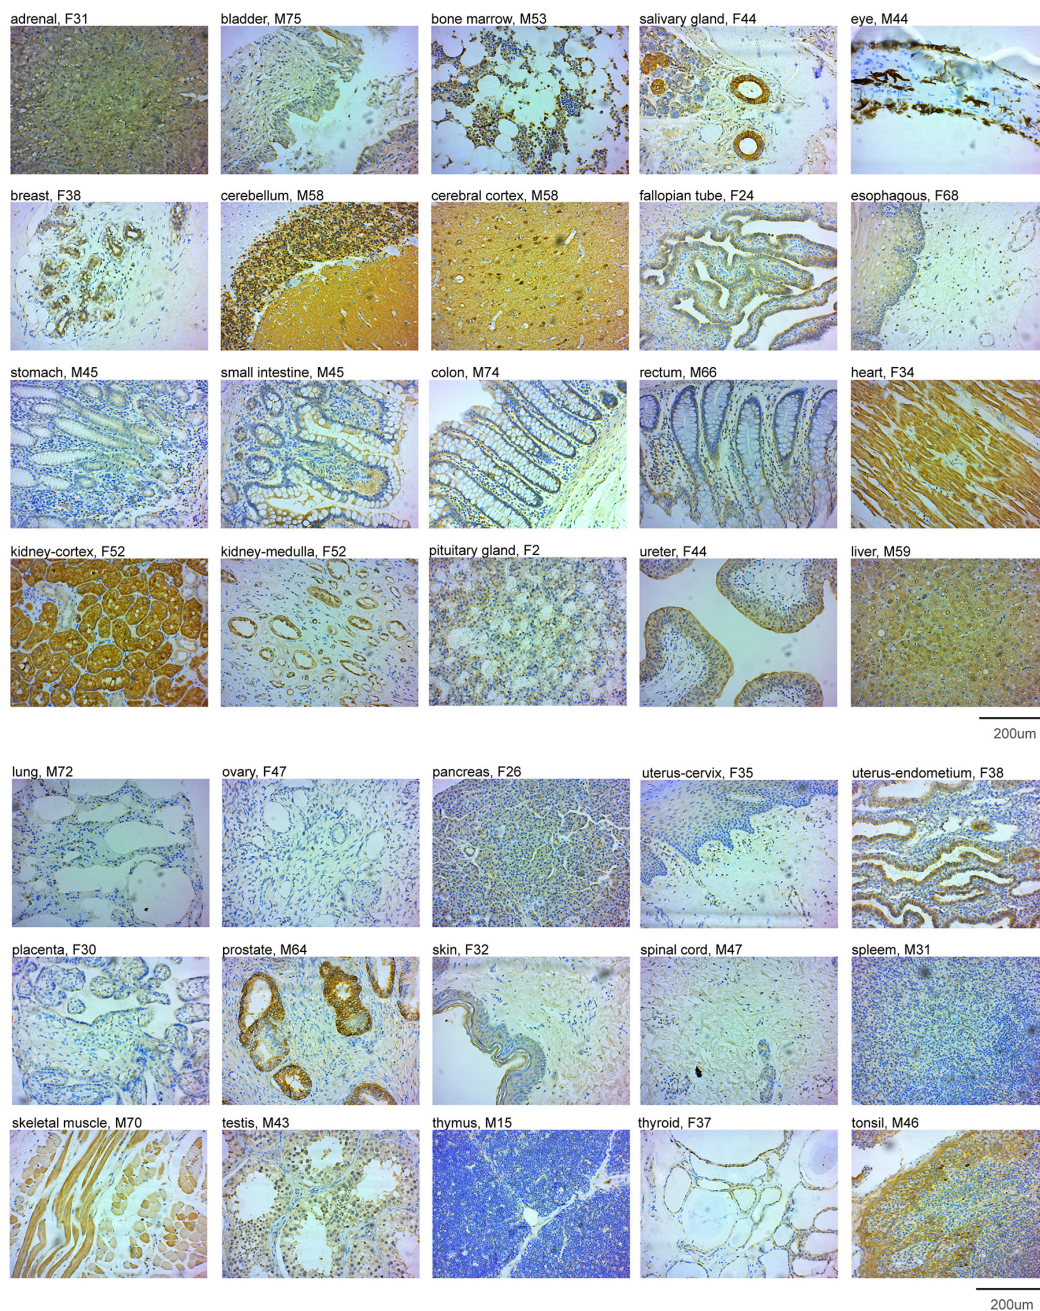

**Supplementary Figure 1: GRB7 expression in normal human tissues.** Examples of tissues from multi-organ tissue microarrays (TMAs) stained with the GRB7 antibody (brown) and Hematoxylin (blue). The type of tissue is indicated at the top of each image, followed by gender (F female, M male) and age (years) of the tissue donor. Images were taken with a 20 × objective, scale bar is 200 μm.

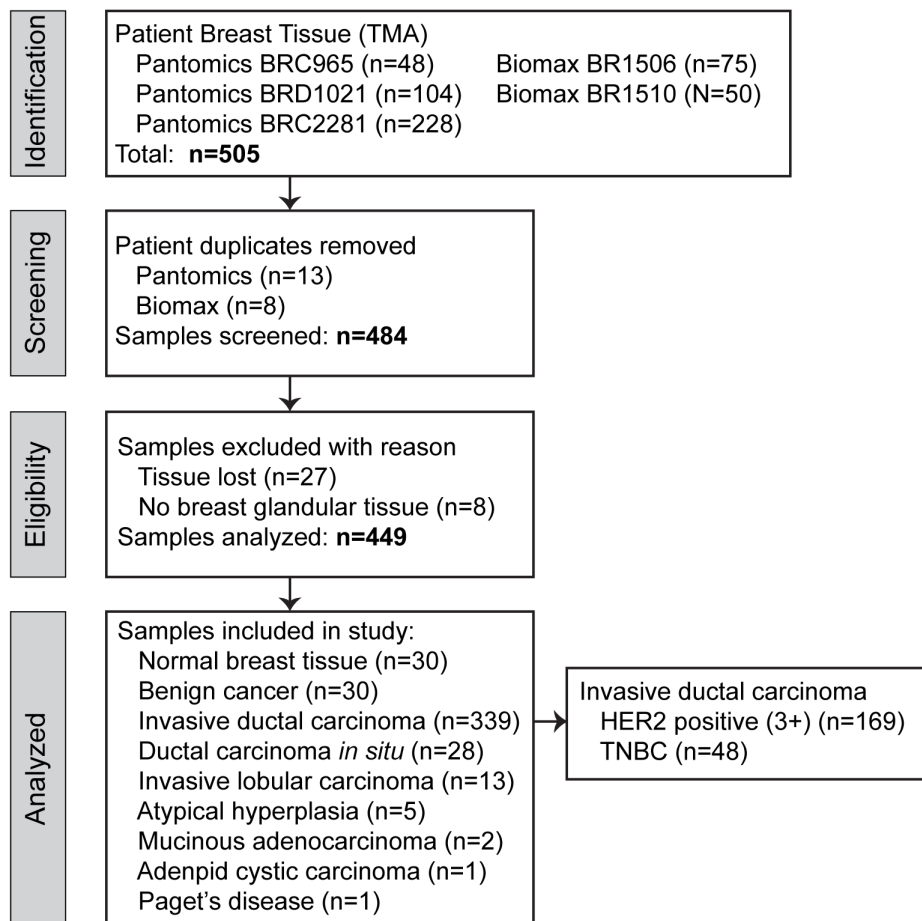

Supplementary Figure 2: Flow chart showing selection and characteristic of breast tissue samples analyzed.

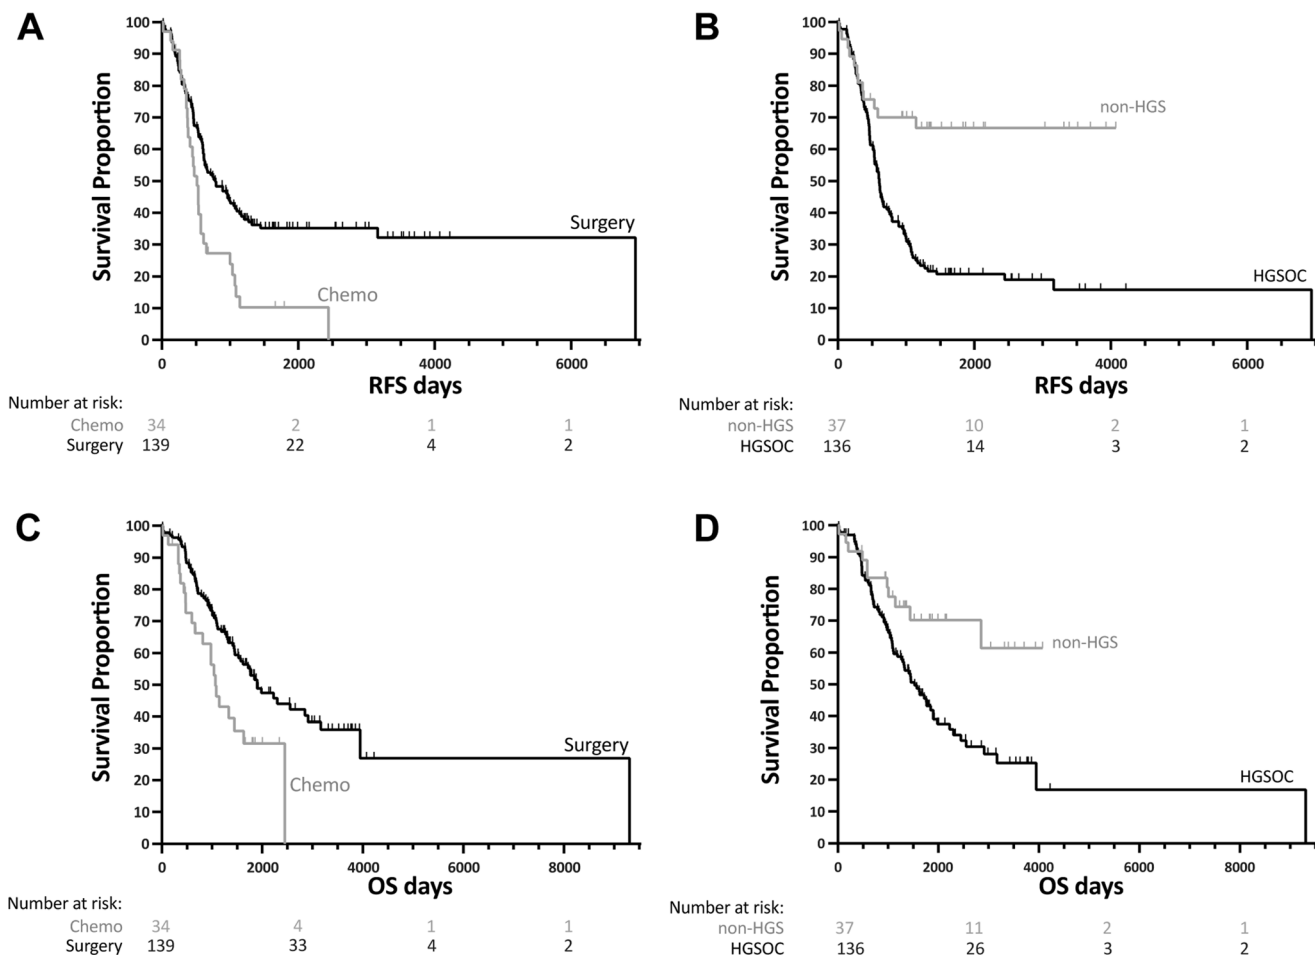

**Supplementary Figure 3: Kaplan-Meier survival curves for ovarian cancer-free intervals for primary cancer treatment and histology.** Recurrence Free Survival (RFS, top) and Overall Survival (OS, bottom) of cohort patients with ovarian cancer by primary treatment and histology. (A, C) neo-adjuvant (gray curves, chemo) vs. adjuvant (black curves, surgery) chemo. (B, D) non-HGS (gray curves, non-high grade serous ovarian cancer) vs. HGSOC (black curves, high grade serous ovarian cancer).

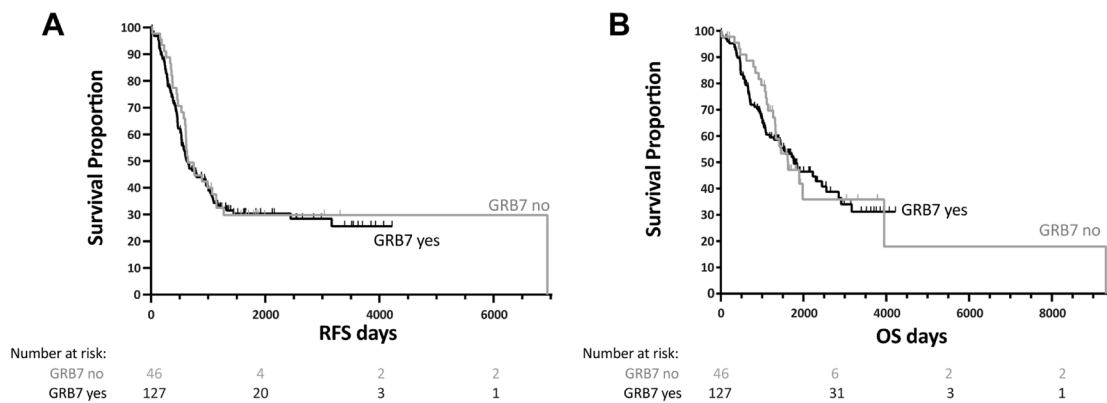

**Supplementary Figure 4: Kaplan-Meier survival curves for cytoplasmic GRB7 staining.** Cytoplasmic GRB7 expression (largest GRB7 expression value of the cores for each patient, black curves, GRB7 yes) vs. no GRB7 expression (gray curves, GRB7 no) has no significantly effects on (A) Recurrence Free Survival (RFS) nor (B) Overall Survival (OS) of patients. All survival curves were generated after dichotomization of GRB7 cytoplasmic expression or no GRB7 cytoplasmic expression, obtained by IHC. *p*-values were calculated by log-rank test.

**Supplementary Table 1: Clinical parameters analyzed of the 173 patients included in the study**

|                   |                    | N                | mean  | median | StdDev | Min | Max | 95% CI (for mean) |
|-------------------|--------------------|------------------|-------|--------|--------|-----|-----|-------------------|
| Primary Treatment | Neo-adjuvant Chemo | 34               | 64.29 | 64.5   | 12.24  | 27  | 56  | (60.02–68.56)     |
|                   | Adjuvant chemo     | 137 <sup>b</sup> | 60.36 | 61     | 12.24  | 20  | 69  | (58.29–62.43)     |
| Histology Type    | Non-HGS            | 35 <sup>b</sup>  | 58.11 | 60     | 12.37  | 24  | 52  | (53.86–62.36)     |
|                   | HGSOC              | 136              | 61.92 | 63     | 12.22  | 20  | 69  | (59.85–63.99)     |
| GRB7 Expression   | 0–1+               | 101 <sup>a</sup> | 59.75 | 60     | 13.36  | 24  | 89  | (57.12–62.39)     |
|                   | 2–3+               | 70 <sup>a</sup>  | 63.14 | 64     | 10.38  | 20  | 84  | (60.67–65.62)     |
| <b>Total</b>      |                    | 171              | 61.14 | 62     | 12.31  | 20  | 89  | (59.28–63.00)     |

Relationship between the age of the patient at diagnosis of ovarian cancer and 1) primary treatment (neo-adjuvant chemo vs. adjuvant chemo), 2) histology type (non-HGS or HGSOC), and 3) GRB7 expression (shown as the maximum value of the available cores / patient). non-HGS = non-high grade serous ovarian cancer, HGSOC = high grade serous ovarian cancer. (a) 1 data point missing for the group, (b) 2 data points missing for the group.

**Supplementary Table 2: Clinical events analyzed for ovarian cancer patients**

| Status                       | Total | Recurrence free survival |       | Overall survival |       |
|------------------------------|-------|--------------------------|-------|------------------|-------|
|                              |       | censored                 | event | censored         | event |
| AWD (alive with disease)     | 35    | 11                       | 24    | 35               | 0     |
| Alive                        | 2     | 2                        | 0     | 2                | 0     |
| DOD (dead of disease)        | 91    | 0                        | 91    | 0                | 91    |
| NED (no evidence of disease) | 44    | 41                       | 3     | 44               | 0     |
| Dead from cerebral palsy     | 1     | 0                        | 1     | 0                | 1     |
| Total                        | 173   | 54                       | 119   | 81               | 92    |

**Supplementary Table 3: Recurrence Free Survival (RFS) and Overall Survival (OS) of cohort patients with ovarian cancer**

| A                 |              | Recurrence free survival (RFS) |       |          | Median survival |              |              | Mean survival |         | Log-rank     |                   |
|-------------------|--------------|--------------------------------|-------|----------|-----------------|--------------|--------------|---------------|---------|--------------|-------------------|
|                   |              | Total                          | Event | Censored | Estimate        | Lower 95% CI | Upper 95% CI | Mean          | SD      | Test p-value |                   |
|                   | all          | 173                            | 119   | 54       | 31.2            | 648          | 575          | 947           | 2323.23 | 239.99       |                   |
| Primary Treatment | Neo-adjuvant | 34                             | 30    | 4        | 11.76           | 516.00       | 381.00       | 575.00        | 726.74  | 116.32       | <b>0.0011</b>     |
|                   | adjuvant     | 139                            | 89    | 50       | 35.97           | 785.00       | 609.00       | 1077.00       | 2688.65 | 277.74       |                   |
| Histology         | Non-HGS      | 37                             | 12    | 25       | 67.57           |              |              |               | 886.64  | 69.91        | <b>&lt;0.0001</b> |
|                   | HGSOC+       | 136                            | 107   | 29       | 21.32           | 609.00       | 533.00       | 716.00        | 1692.34 | 235.48       |                   |
| B                 |              | Overall survival (OS)          |       |          | Median survival |              |              | Mean survival |         | Log-rank     |                   |
|                   |              | Total                          | Event | Censored | Estimate        | Lower 95% CI | Upper 95% CI | Mean          | SD      | Test p-value |                   |
|                   | all          | 173                            | 92    | 81       | 46.82           | 1758.00      | 1411.00      | 2299.00       | 3427.58 | 492.31       |                   |
| Primary Treatment | Neo-adjuvant | 34                             | 22    | 12       | 35.29           | 1070.00      | 660.00       | 1628.00       | 1306.93 | 157.23       | <b>0.0066</b>     |
|                   | adjuvant     | 139                            | 70    | 69       | 49.64           | 1899.00      | 1527.00      | 2909.00       | 3707.65 | 548.17       |                   |
| Histology         | Non-HGS      | 37                             | 11    | 26       | 70.27           |              | 2849.00      |               | 2212.36 | 180.95       | <b>0.0066</b>     |
|                   | HGSOC+       | 136                            | 81    | 55       | 40.44           | 1527.00      | 1184.00      | 1899.00       | 2844.11 | 485.55       |                   |

(A) RFS and OS based on primary treatment (neo-adjuvant vs. adjuvant chemo). (B) RFS and OS based on histology (non-HGS vs. HGSOC).



**Supplementary Table 4: No significant correlation between cytoplasmic GRB7 staining and RFS nor OS was detected in patients with ovarian cancer**

| A   |        | # of events |       |          | Median survival |              |              | Mean survival |         | Log-rank     |        |
|-----|--------|-------------|-------|----------|-----------------|--------------|--------------|---------------|---------|--------------|--------|
|     |        | Total       | Event | Censored | Estimate        | Lower 95% CI | Upper 95% CI | Mean          | SD      | Test p-value |        |
|     | 0      | 46          | 31    | 15       | 32.61           | 648.00       | 575.00       | 1140.00       | 2487.70 | 458.50       | 0.6687 |
| RFS | 1,2,3+ | 127         | 88    | 39       | 30.71           | 630.00       | 533.00       | 966.00        | 1316.63 | 112.35       |        |
|     | all    | 173         | 119   | 54       | 31.21           | 648          | 575          | 947           | 2323.23 | 239.99       |        |
|     | 0      | 46          | 25    | 21       | 45.65           | 1628.00      | 1309.00      | 3945.00       | 3148.59 | 853.71       | 0.7850 |
| OS  | 1,2,3+ | 127         | 67    | 60       | 47.24           | 1763.00      | 1292.00      | 2554.00       | 1864.60 | 110.39       |        |
|     | all    | 173         | 92    | 81       | 46.82           | 1758.00      | 1411.00      | 2299.00       | 3427.58 | 492.31       |        |
| B   |        | # of events |       |          | Median survival |              |              | Mean survival |         | Log-rank     |        |
|     |        | Total       | Event | Censored | Estimate        | Lower 95% CI | Upper 95% CI | Mean          | SD      | Test p-value |        |
|     | 0      | 46          | 31    | 15       | 32.61           | 648.00       | 575.00       | 1140.00       | 2487.70 | 458.50       | 0.7484 |
|     | 1+     | 56          | 40    | 16       | 28.57           | 607.50       | 468.00       | 967.00        | 781.36  | 69.15        |        |
| RFS | 2+     | 33          | 24    | 9        | 27.27           | 600.00       | 433.00       | 1077.00       | 709.83  | 71.09        |        |
|     | 3+     | 38          | 24    | 14       | 36.84           | 756.50       | 517.00       | 3164.00       | 1546.59 | 218.93       |        |
|     | all    | 173         | 119   | 54       | 31.2            | 648          | 575          | 947           | 2323.23 | 239.99       |        |
|     | 0      | 46          | 25    | 21       | 45.65           | 1628.00      | 1309.00      | 3945.00       | 3148.59 | 853.71       | 0.7166 |
| OS  | 1+     | 56          | 27    | 29       | 51.79           | 2223.00      | 1184.00      |               | 1900.41 | 152.11       |        |
|     | 2+     | 33          | 19    | 14       | 42.42           | 1292.00      | 663.00       |               | 1190.03 | 106.45       |        |
|     | 3+     | 38          | 21    | 17       | 44.74           | 1899.00      | 914.00       | 3164.00       | 1861.47 | 202.69       |        |
|     | all    | 173         | 92    | 81       | 46.82           | 1758.00      | 1411.00      | 2299.00       | 3427.58 | 492.31       |        |
| C   |        | # of events |       |          | Median survival |              |              | Mean survival |         | Log-rank     |        |
|     |        | Total       | Event | Censored | Estimate        | Lower 95% CI | Upper 95% CI | Mean          | SD      | Test p-value |        |
|     | 0 – 2+ | 135         | 95    | 40       | 29.63           | 630.00       | 540.00       | 967.00        | 2299.14 | 257.03       | 0.4190 |
| RFS | 3+     | 38          | 24    | 14       | 36.84           | 756.50       | 517.00       | 3164.00       | 1546.59 | 218.93       |        |
|     | all    | 173         | 119   | 54       | 31.21           | 648          | 575          | 947           | 2323.23 | 239.99       |        |
|     | 0 – 2+ | 135         | 71    | 64       | 47.41           | 1758.00      | 1330.00      | 2299.00       | 3369.80 | 605.81       | 0.8321 |
| OS  | 3+     | 38          | 21    | 17       | 44.74           | 1899.00      | 914.00       | 3164.00       | 1861.47 | 202.69       |        |
|     | all    | 173         | 92    | 81       | 46.82           | 1758.00      | 1411.00      | 2299.00       | 3427.58 | 492.31       |        |

(A) GRB7 expression in the cytoplasm does not significantly change RFS nor OS. (B) Strong expression of cytoplasmic GRB7 (3+) is not significantly different when compared to medium (2+), weak (1+) or no GRB7 staining. (C) Strong expression of cytoplasmic GRB7 (3+) is not significantly different when compared to less than strong (0 to 2+) GRB7 staining.
